# Supplementary material for: Effects of IFN-γ coding plasmid supplementation in the immune response and protection elicited by Trypanosoma cruzi attenuated parasites
Source: PubMed Central journal article supplement (PMC5702110; doi:10.1186/s12879-017-2834-6), 2017-11-25

## INTRAMUSCULAR

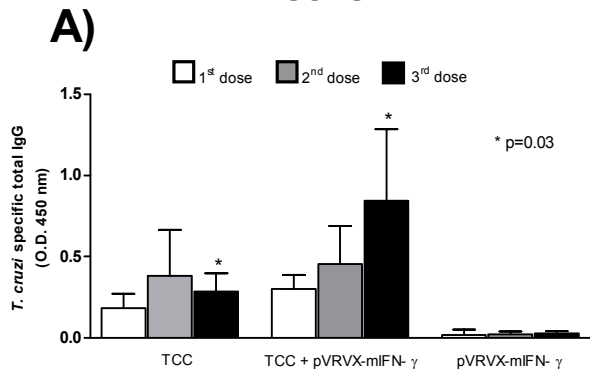

## ORAL

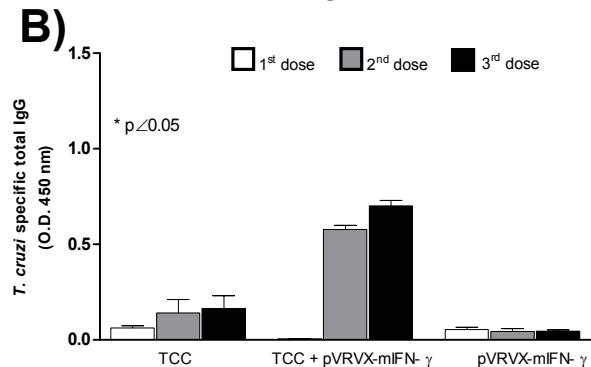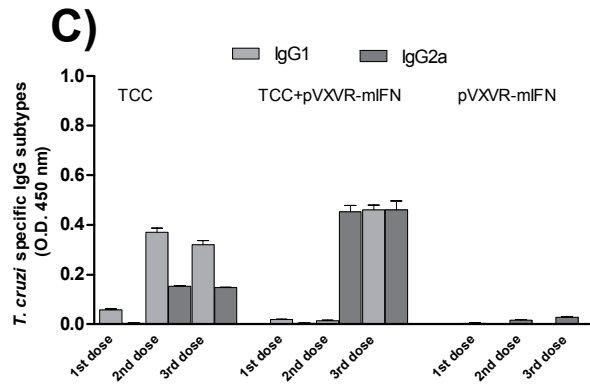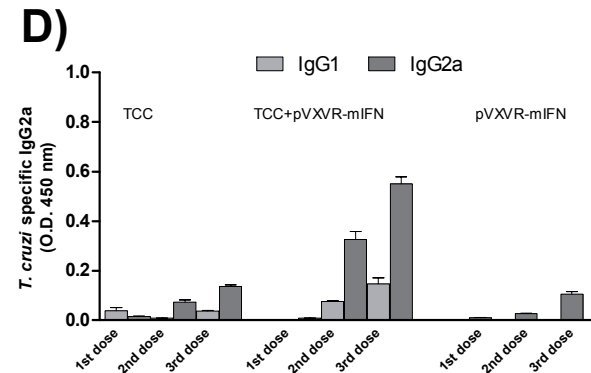

Supplement: 12879_2017_2834_MOESM1_ESM.pdf [file 12879_2017_2834_MOESM1_ESM.pdf]
